# Supplementary material for: Al2O3/CuI/PANI nanocomposite catalyzed green synthesis of biologically active 2-substituted benzimidazole derivatives
Source: Royal Society of Chemistry journal article supplement (doi:10.1039/d1dt00806d), 2021-01-01

# **Al<sub>2</sub>O<sub>3</sub>/CuI/PANI nanocomposite catalyzed green synthesis of biologically active 2-substituted benzimidazole derivatives**

*Sahil Kohli,<sup>1</sup> Garima Rathee,<sup>1</sup> Sunita Hooda<sup>2,b\*</sup> and Ramesh Chandra<sup>1,a\*</sup>*

- 1- Drug Discovery & Development Laboratory, Department of Chemistry, University of Delhi, Delhi-110007, India.
- 2- Department of Chemistry, Acharya Narendra Dev College, University of Delhi, Delhi-110019, India.

## **\*Correspondence:**

(a) Prof. Ramesh Chandra, Drug Discovery and Development Laboratory, Department of Chemistry, University of Delhi, Delhi-110007, India. E-mail: acbrdu@hotmail.com, rameshchandragroup@gmail.com.

(b) Dr. Sunita Hooda, *Department of Chemistry, Acharya Narendra Dev College, University of Delhi, Delhi-110019, India.* E-mail: hooda\_sunita@hotmail.com.

Electronic Supplementary Information (ESI) includes SEM and XRD of recycled Al<sub>2</sub>O<sub>3</sub>/CuI/PANI nanocatalyst; Green chemistry metric calculations, <sup>1</sup>H NMR and <sup>13</sup>C NMR spectra of all compounds.

**Total No of Pages: 20, Total No of Tables: 0, Total number of Figures: 2.**

### Table of contents

| Serial number | Content                                                                       | Page number |
|---------------|-------------------------------------------------------------------------------|-------------|
| 1.            | General Remarks                                                               | S3          |
| 2.            | SEM and XRD of recycled Al <sub>2</sub> O <sub>3</sub> /CuI/PANI nanocatalyst | S4          |
| 3.            | Calculation of Green chemistry metrics                                        | S5-S6       |
| 4.            | <sup>1</sup> H and <sup>13</sup> C spectra of compounds                       | S7-S20      |
| 5.            | Mass Spectra of Selected Compounds                                            | S21-S25     |

## 1. General Remarks

Chemicals and solvents were purchased from Sigma Adrich, Alfa-Aesar and Merck India Pvt.  $^1\text{H}$  and  $^{13}\text{C}$  spectra were recorded on a Jeol Spectrospin spectrometer at 400 MHz and 100 MHz respectively by keeping TMS as internal standard. CHNS Analyser was recorded on model Vario Micro Cube at USIC (University Science Instrument Centre), University of Delhi, Delhi, India. Mass spectral data were recorded on MALDI MS - ABI Sciex 5800 TOF/ TOF System with LC-MALDI. The X-ray diffractometer (Model No. D8 DISCOVER) at  $2\theta$  range of  $10\text{--}90^\circ$  with Cu  $K\alpha$  radiation. Chemical shift values were recorded in terms of  $\delta$  and coupling constants (J) are in hertz (Hz). FTIR spectra were obtained on IRAffinity-1S Fourier Transform Infrared Spectrophotometer. Scanning Electron microscopy (SEM) measurement was performed on JEOL JSM 6610 at USIC, University of Delhi. Transmission electron microscopy (TEM) was obtained on a TECNAI G20 HR-TEM 200kV at SAIF (sophisticated analytical instrumentation facility), AIIMS, New Delhi, India. The elemental composition and electronic structure analysis were obtained from X-ray photoelectron spectra (XPS) of PHI 5000 Versa Probe III instrument at Institute Instrumentation Centre, Indian Institute of Technology, Roorkee – 247 667 (Uttarakhand), India. BET experiment was performed on BET Surface Area Measurement Equipment, IISC Bangalore.

## 2. SEM and XRD of recycled $\text{Al}_2\text{O}_3/\text{CuI}/\text{PANI}$ nanocatalyst

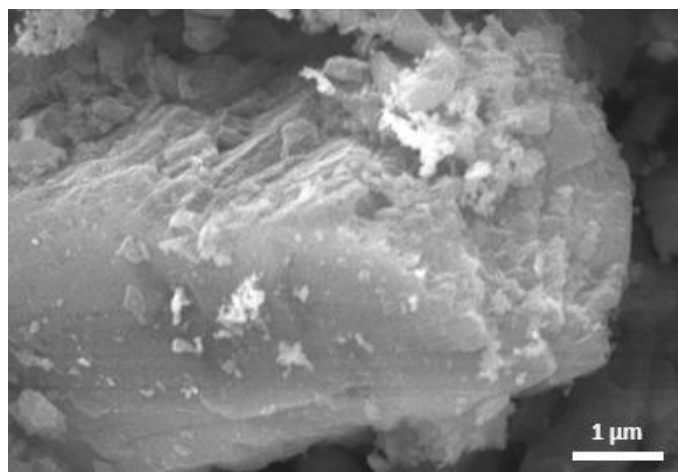

**Figure S1:** SEM image of recycled  $\text{Al}_2\text{O}_3/\text{CuI}/\text{PANI}$  nanocomposites

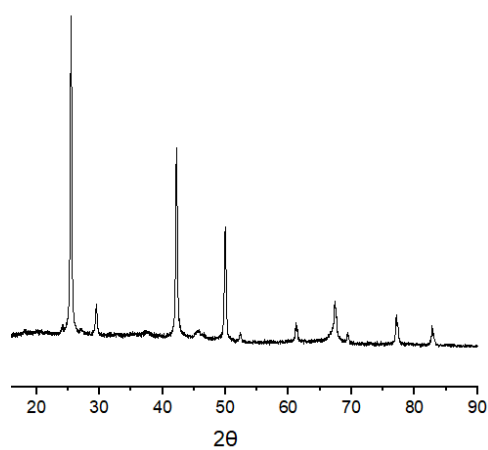

**Figure S2:** XRD of recycled  $\text{Al}_2\text{O}_3/\text{CuI}/\text{PANI}$  nanocomposites

### 3. Calculation of Green chemistry metrics for 3i of our method

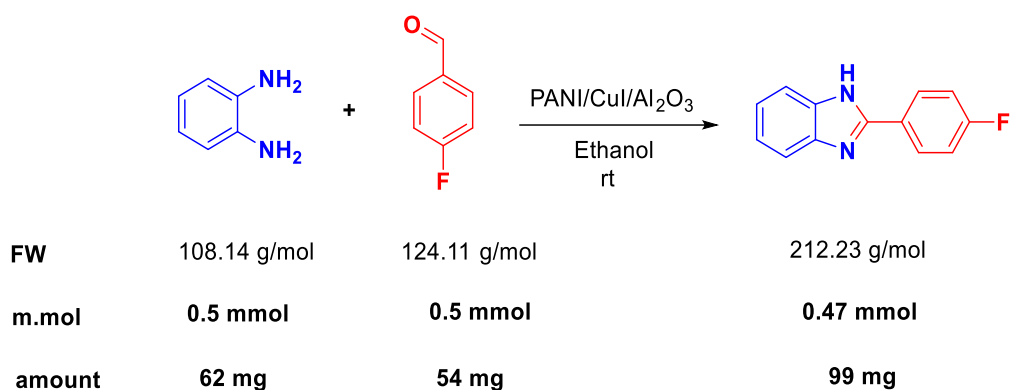

#### E-factor:

The ideal value of E-factor is zero.

E-factor = [total mass of raw materials - the total mass of product]/ mass of product.

E-factor of i = [(62 + 54)-99]/99

= 0.17.

#### Process mass intensity (PMI):

PMI=  $\sum$  (mass of stoichiometric reactants)/[mass of product]

= (62+ 54)/ 99

= 1.17.

#### Reaction mass efficiency (RME):

RME = [mass of product /  $\sum$  (mass of stoichiometric reactants)]  $\times$  100

= [99 / (62+ 54)]  $\times$  100

= 85.34%

#### Carbon efficiency (CE):

CE denotes the percentage of carbon in the reactants that remains in the product.

$$CE = [\text{Amount of carbon in product} / \text{Total carbon present in reactants}] \times 100$$

$$= [\text{no. of moles of product} \times \text{no. of carbons in product} / (\text{moles of a} \times \text{carbons in 1i} + \text{moles of 2 carbons in 2})] \times 100$$

$$= [0.47 \times 13 / (0.5 \times 7 + 0.5 \times 6)] \times 100$$

$$= [6.11 / (3.5 + 3)] \times 100$$

$$= 94\%$$

#### 4. $^1\text{H}$ and $^{13}\text{C}$ Spectra of compounds

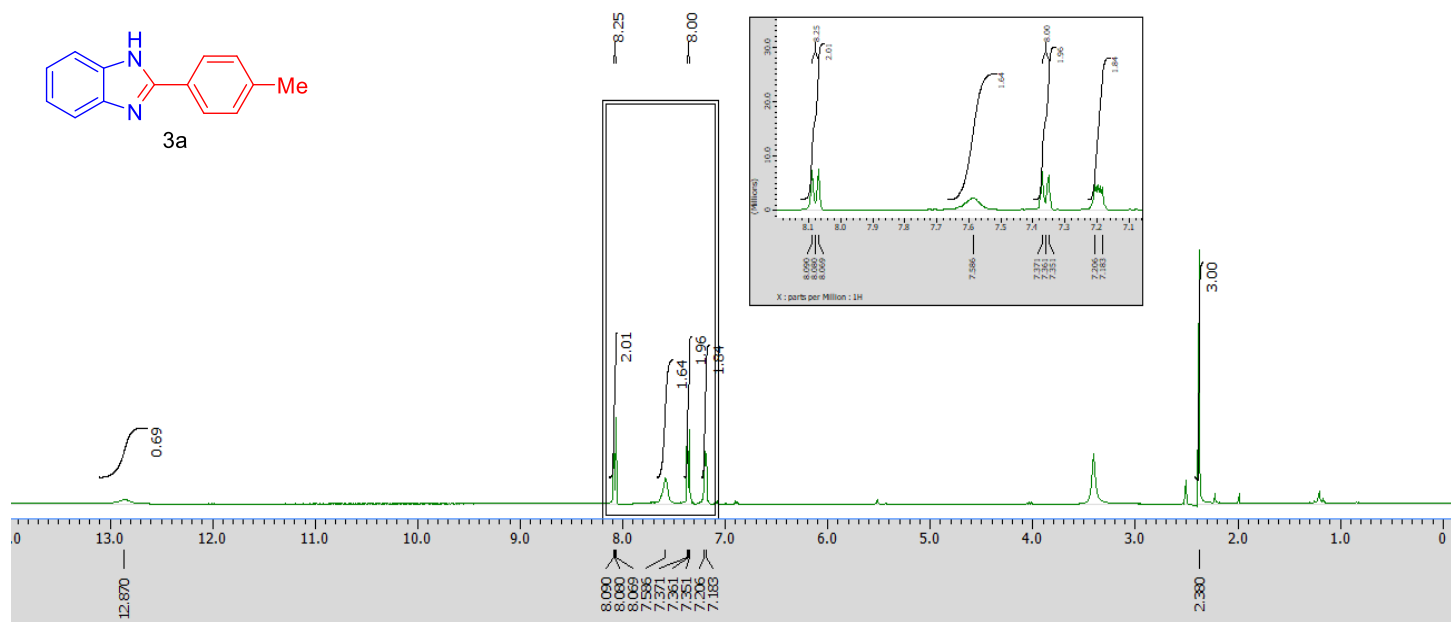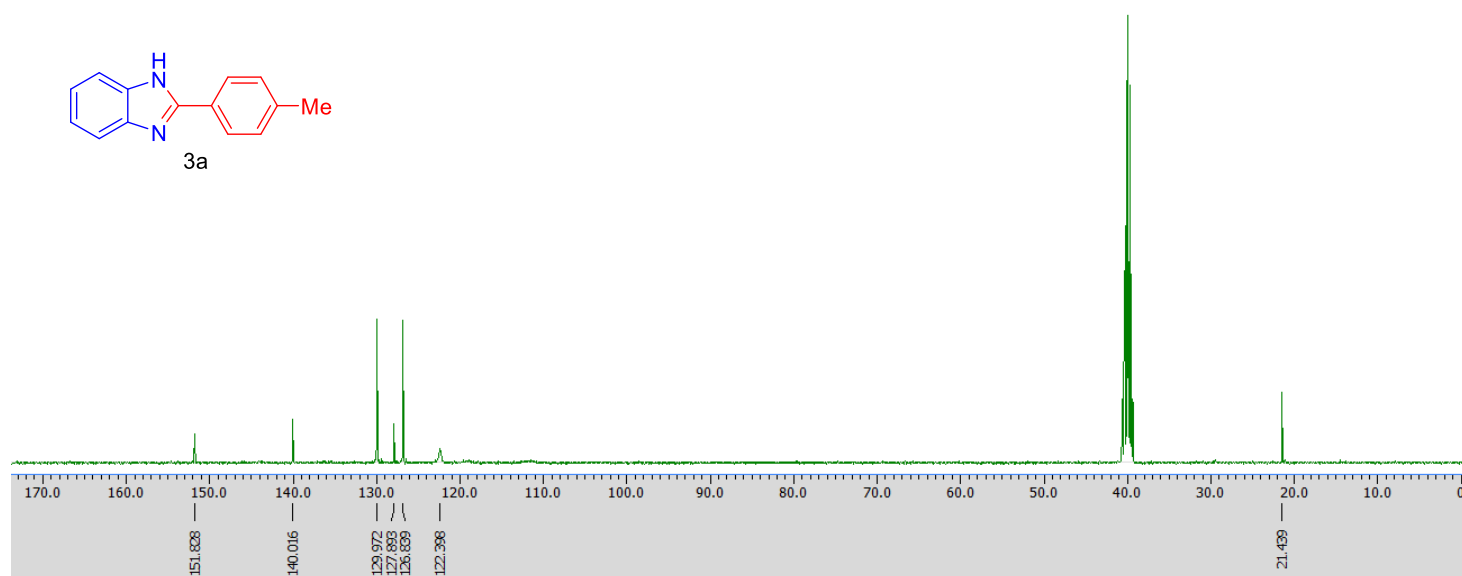

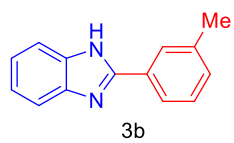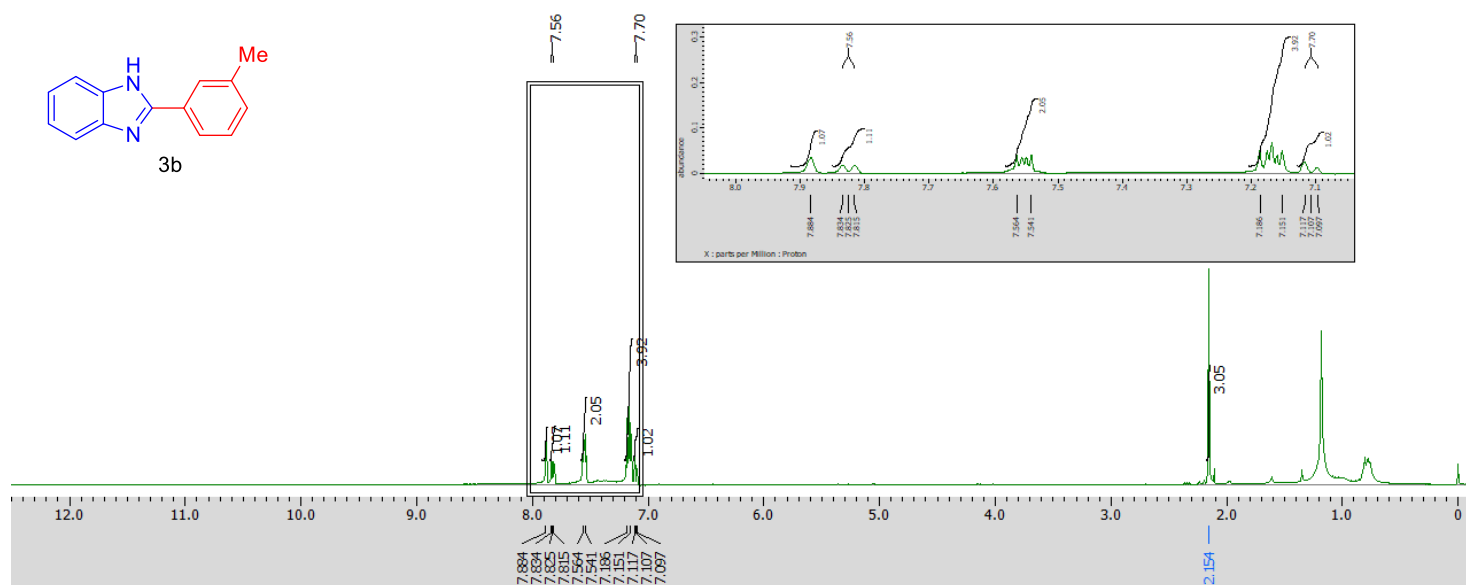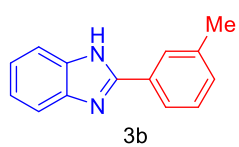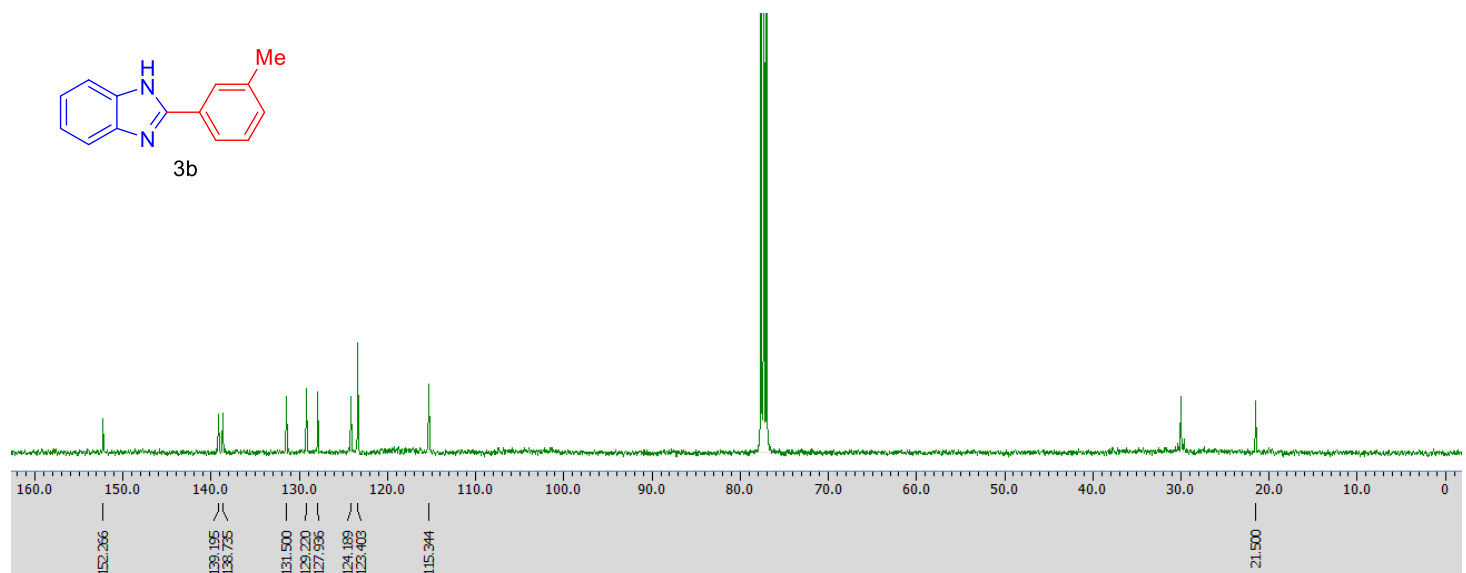



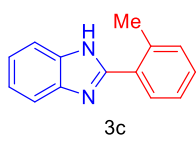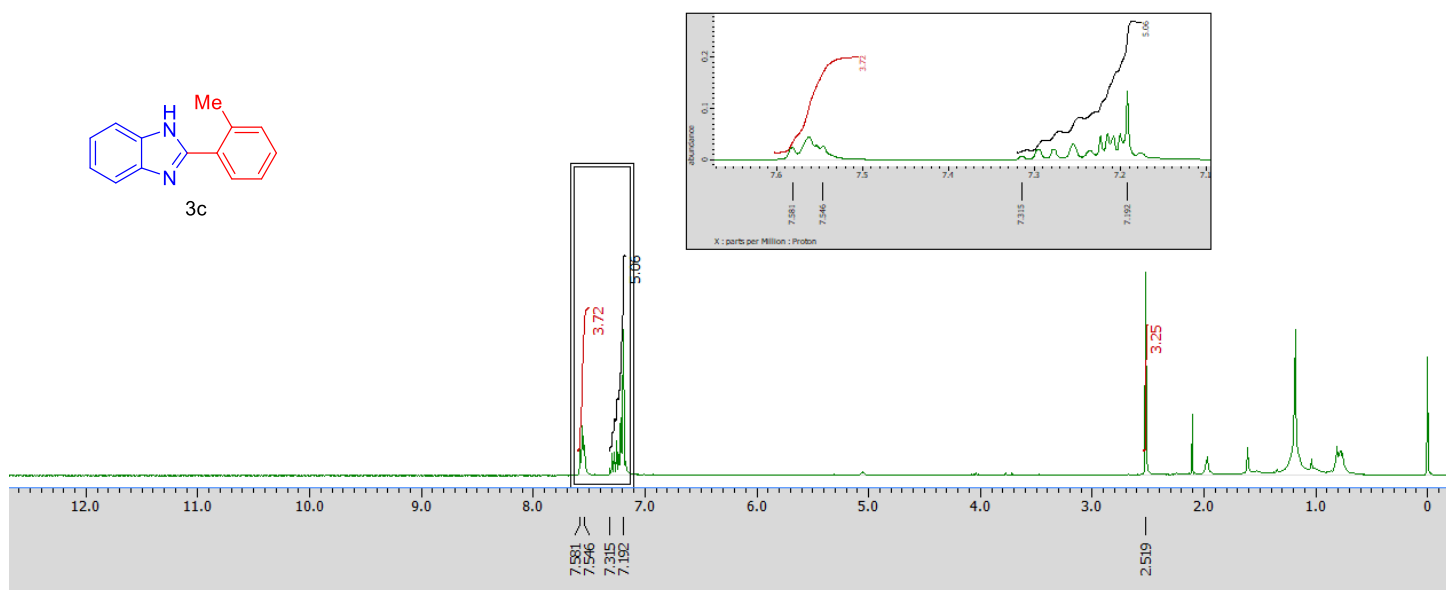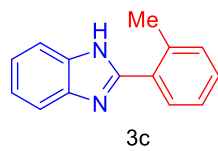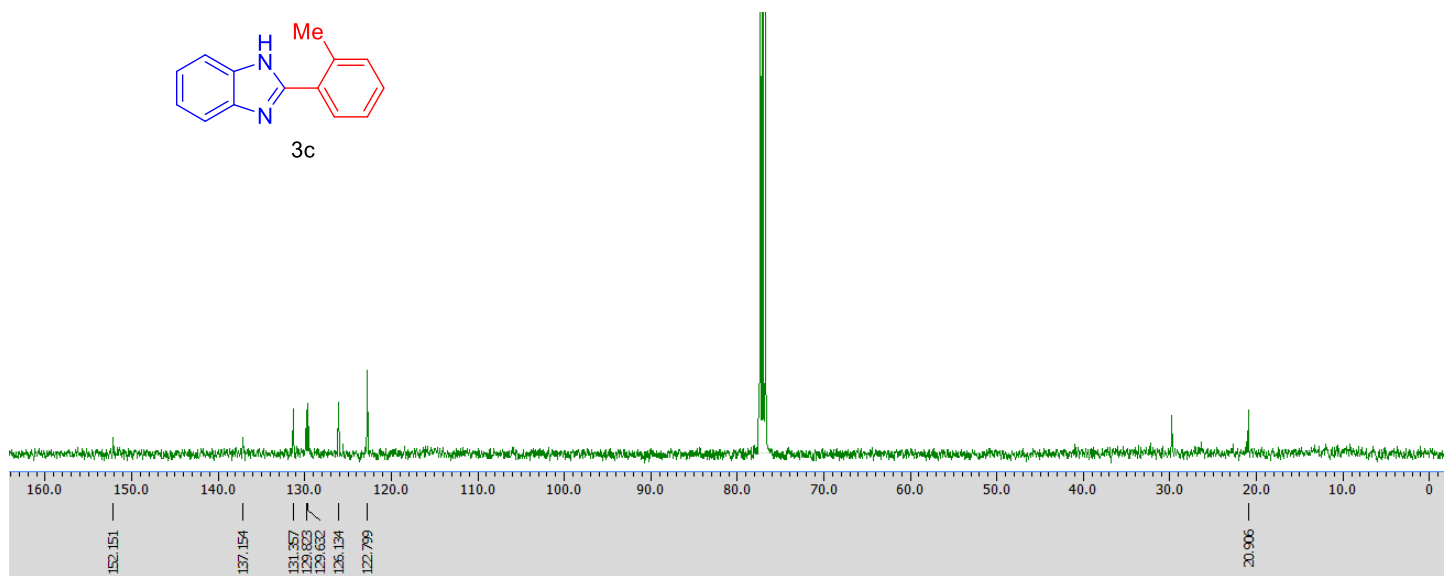

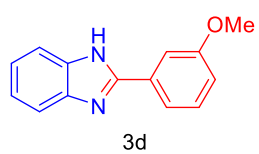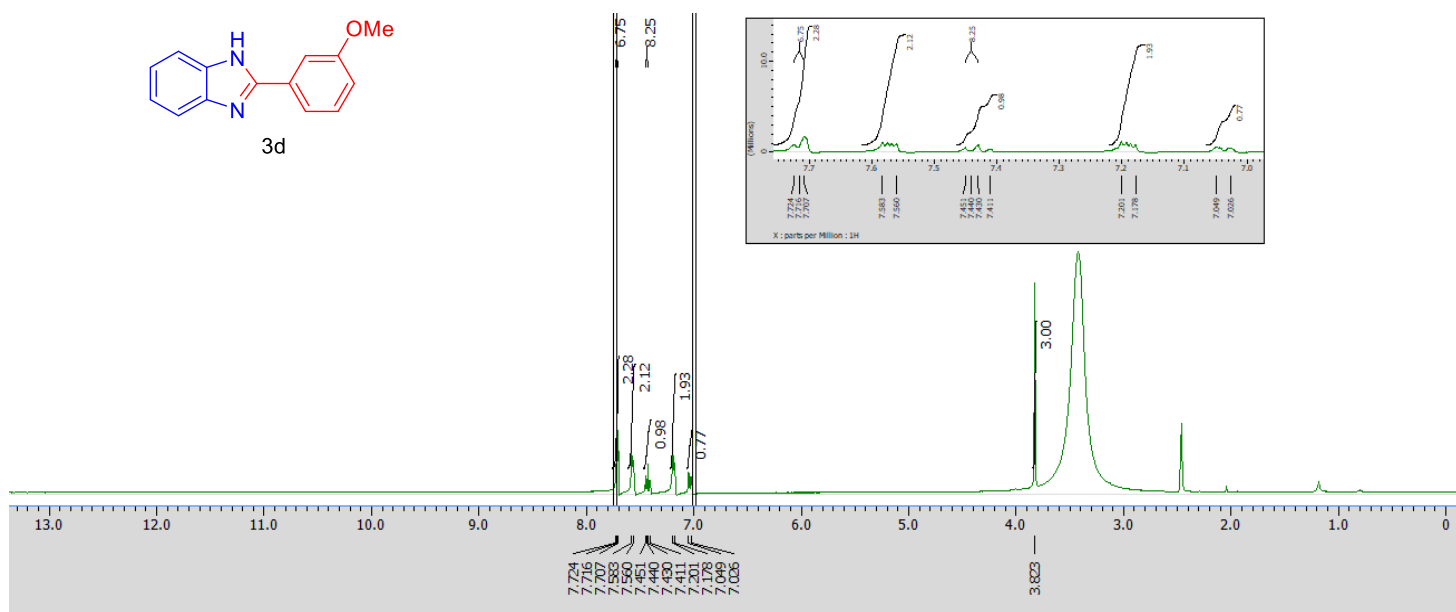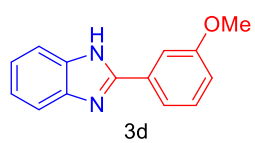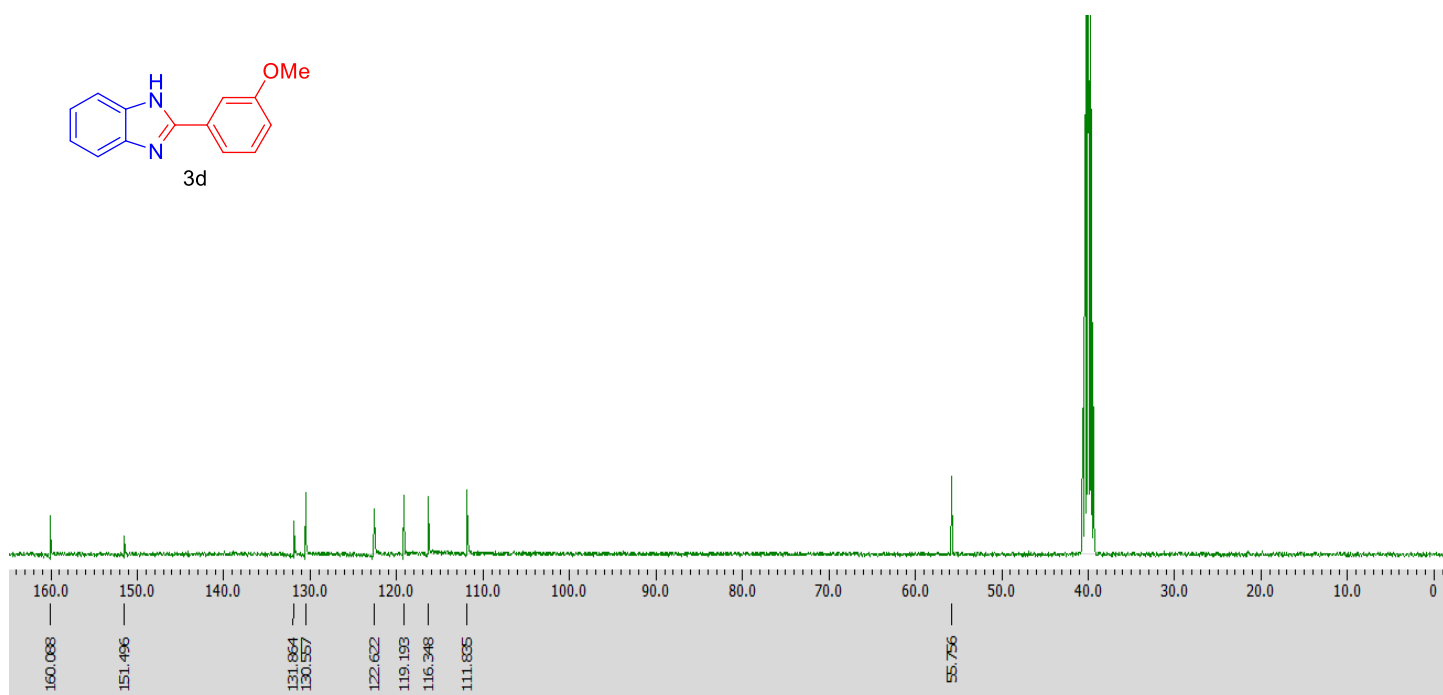

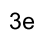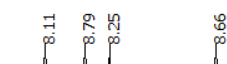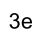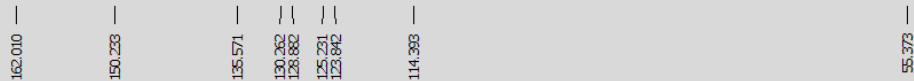

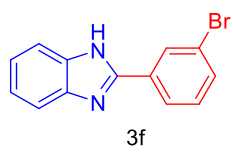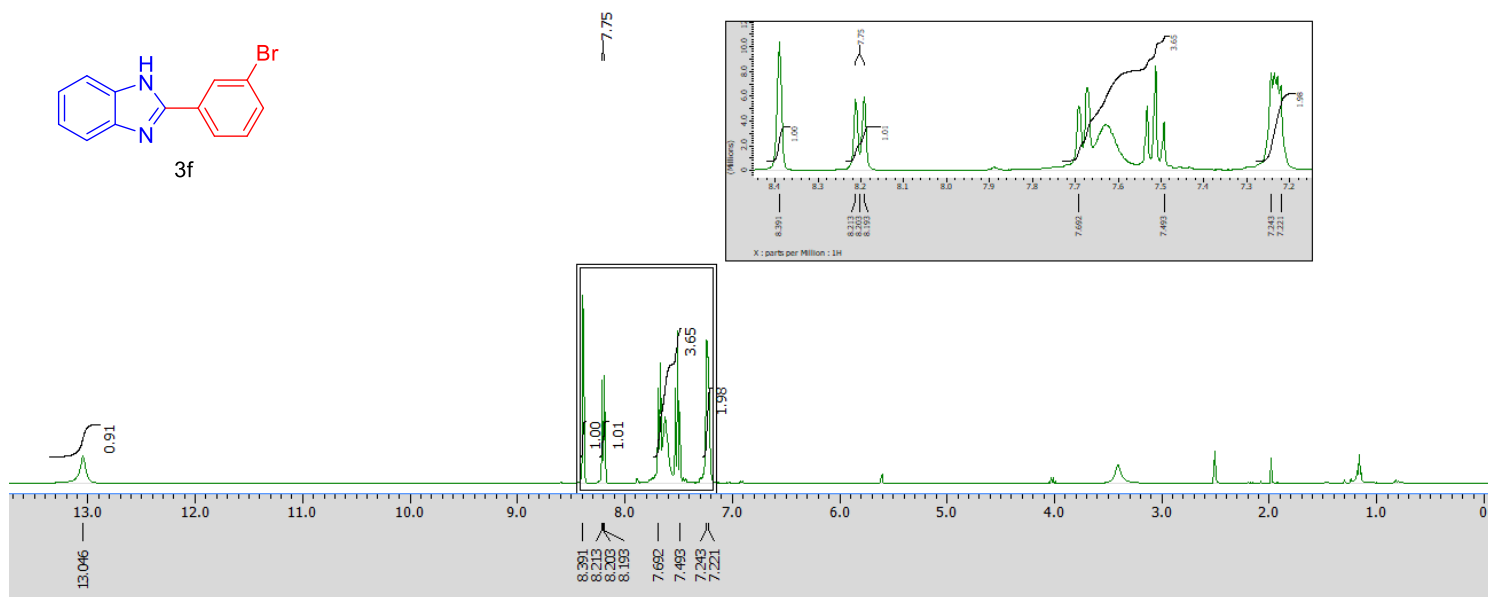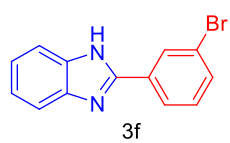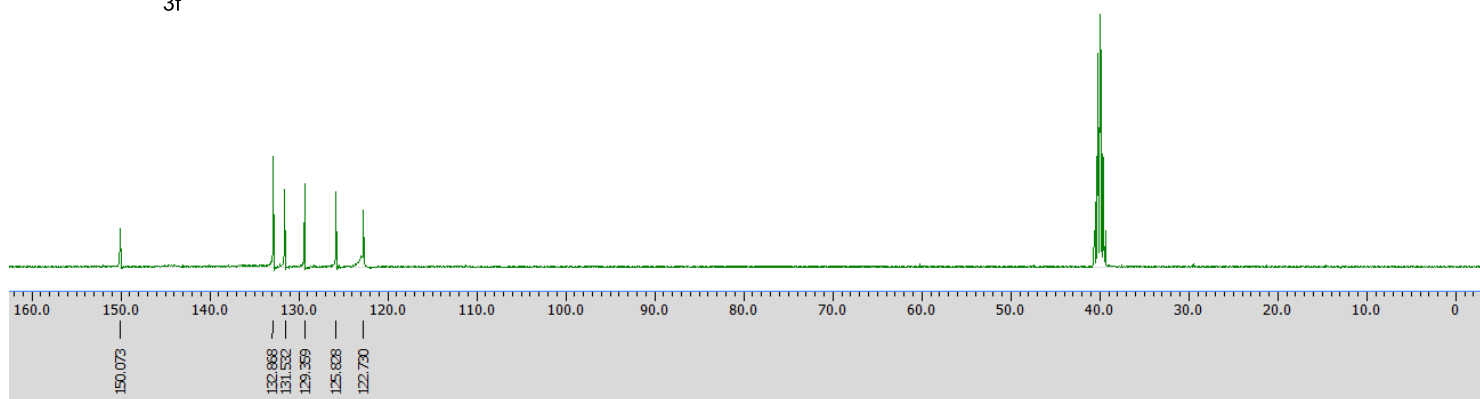

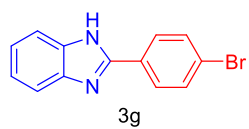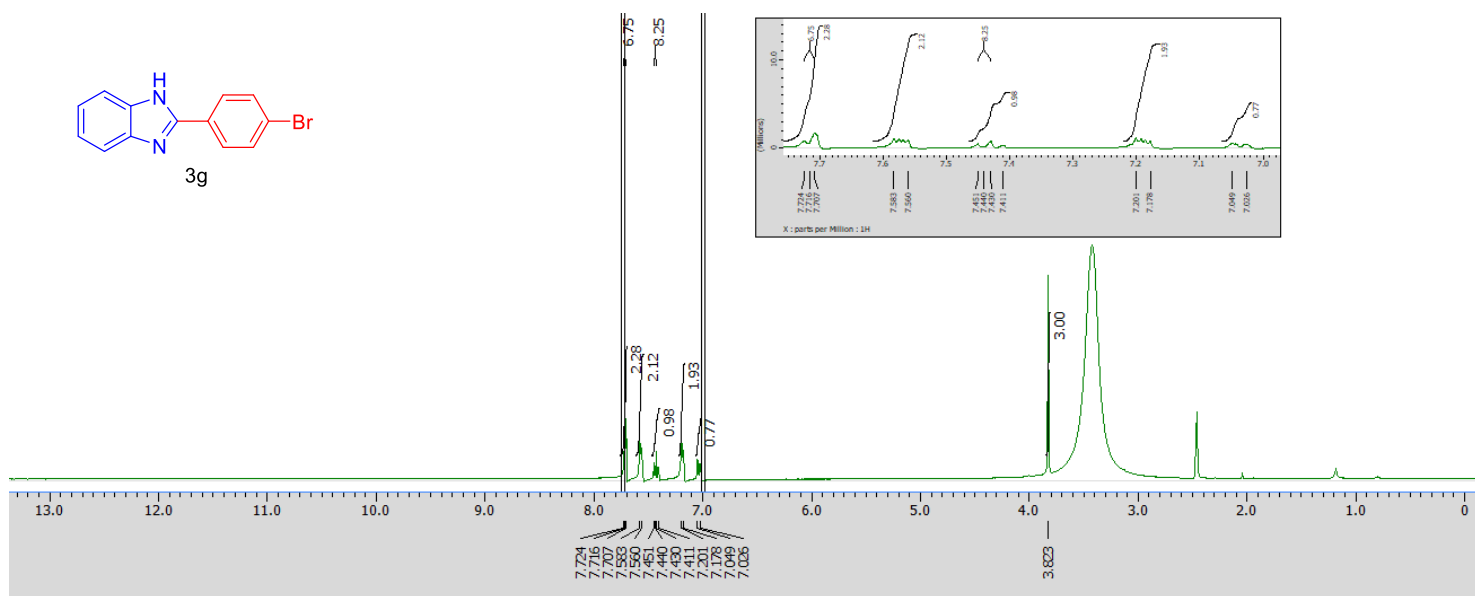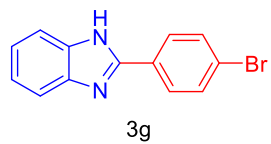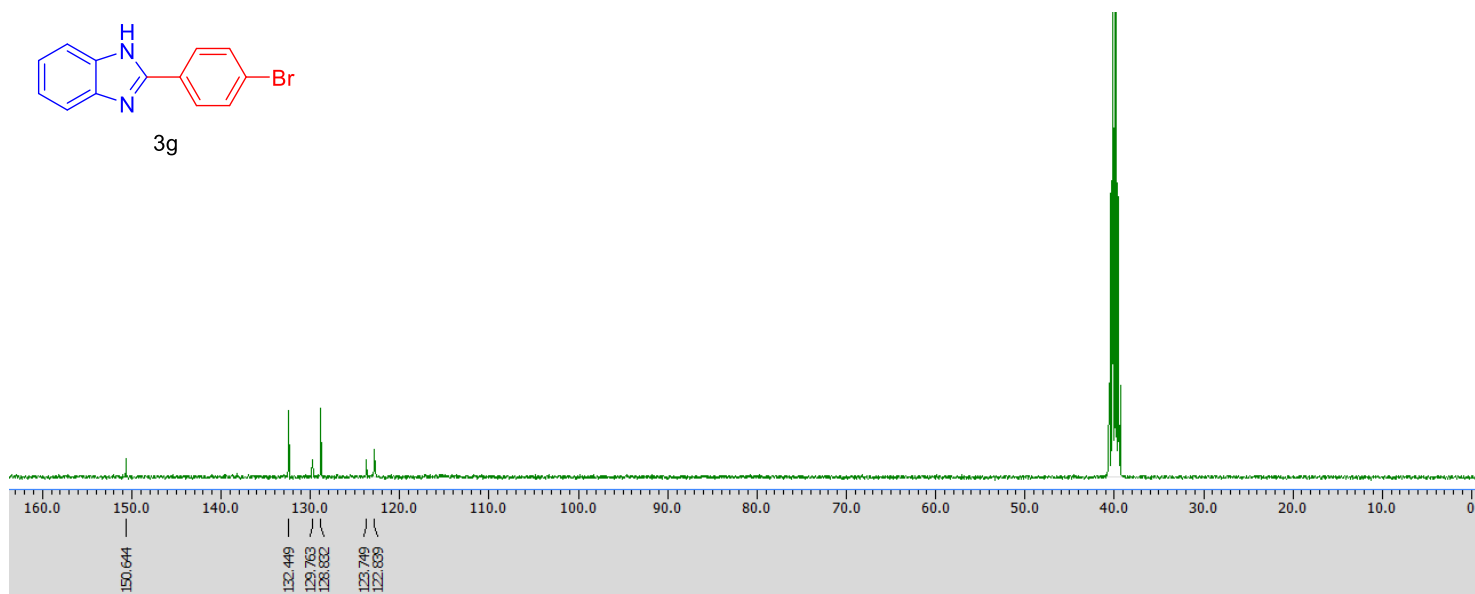

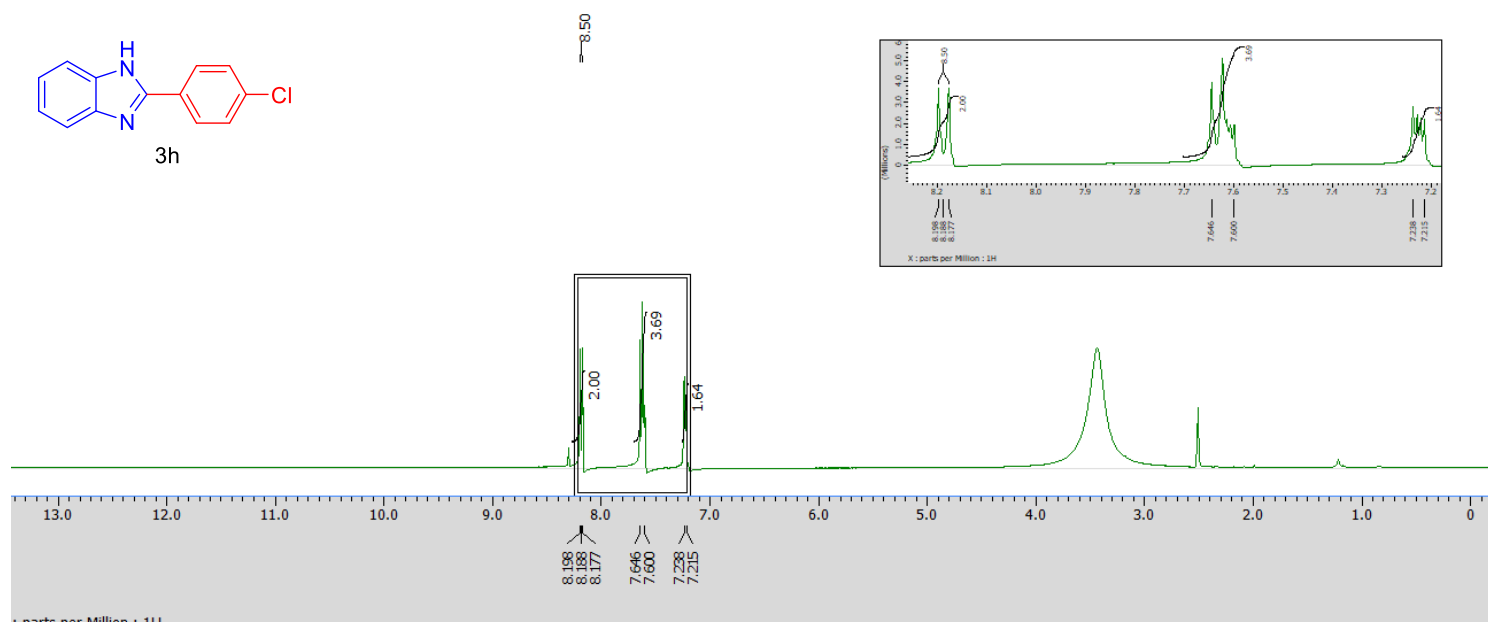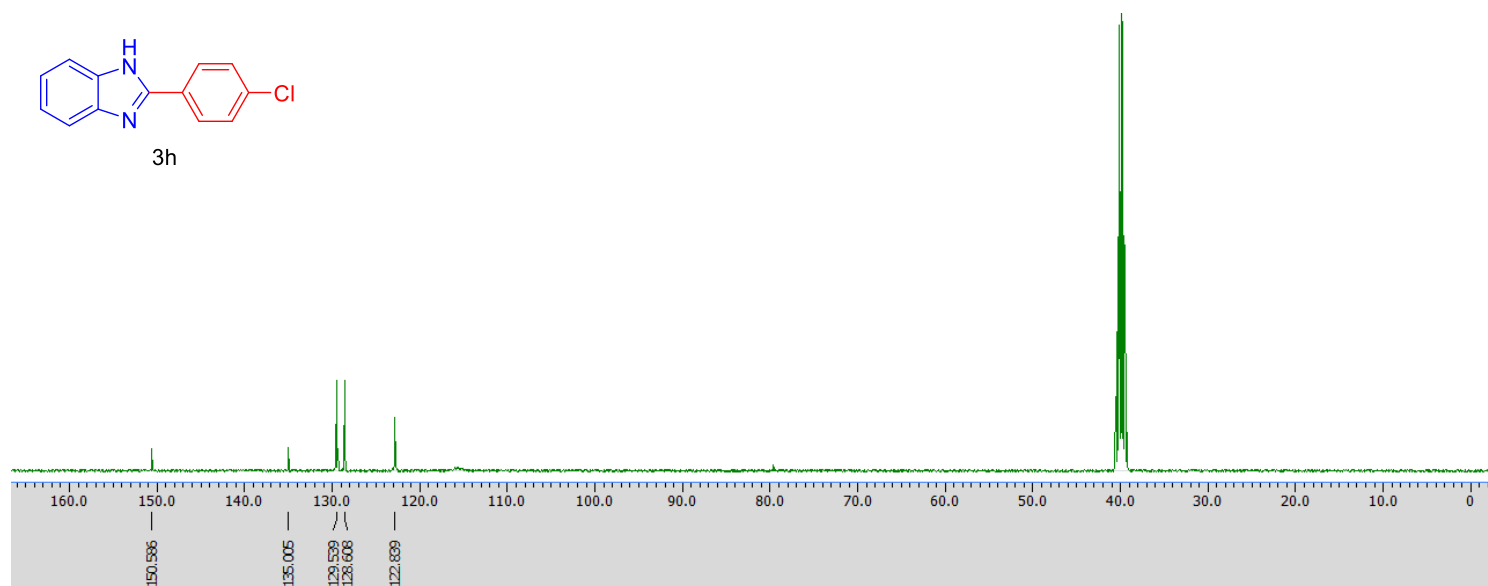

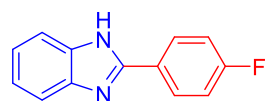

3i

8.88  
3.00

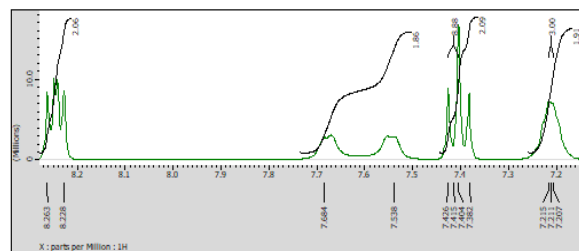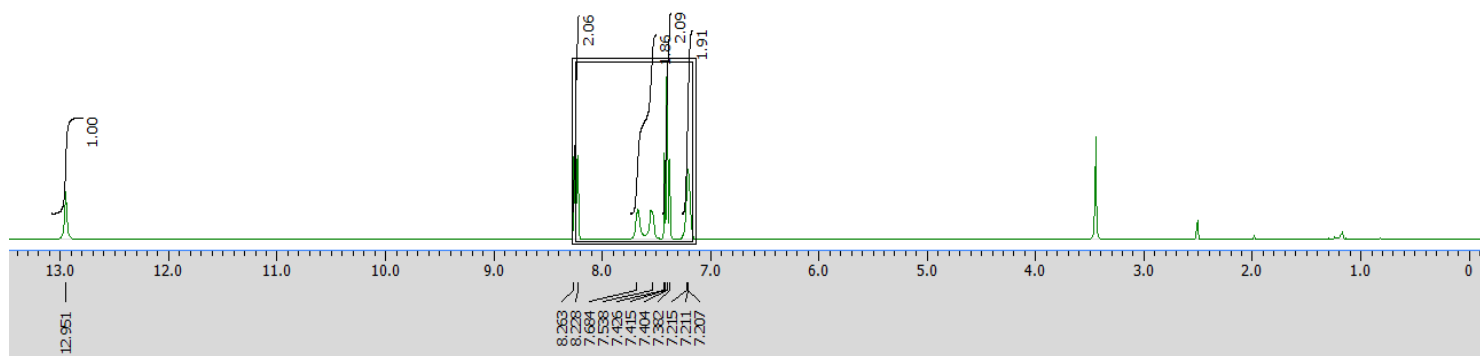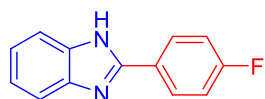

3i

8.72  
2.18

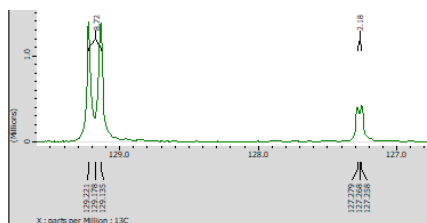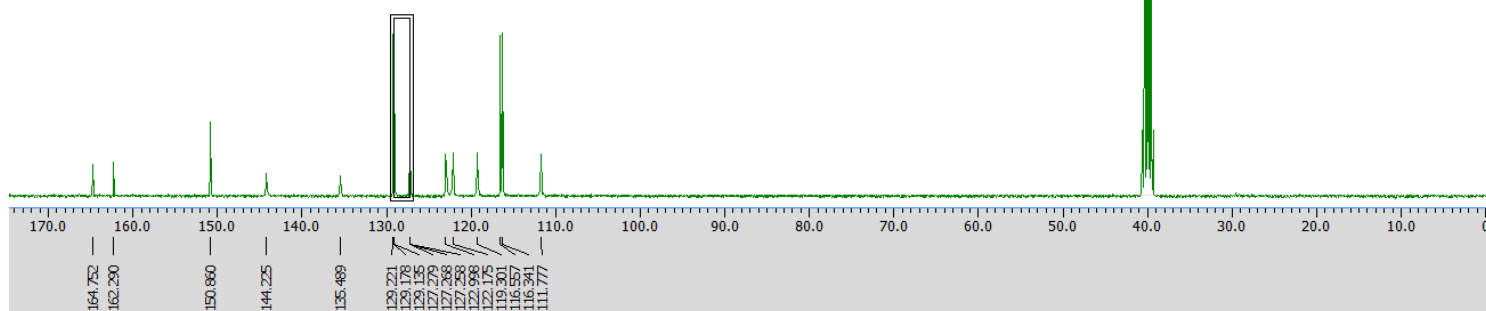

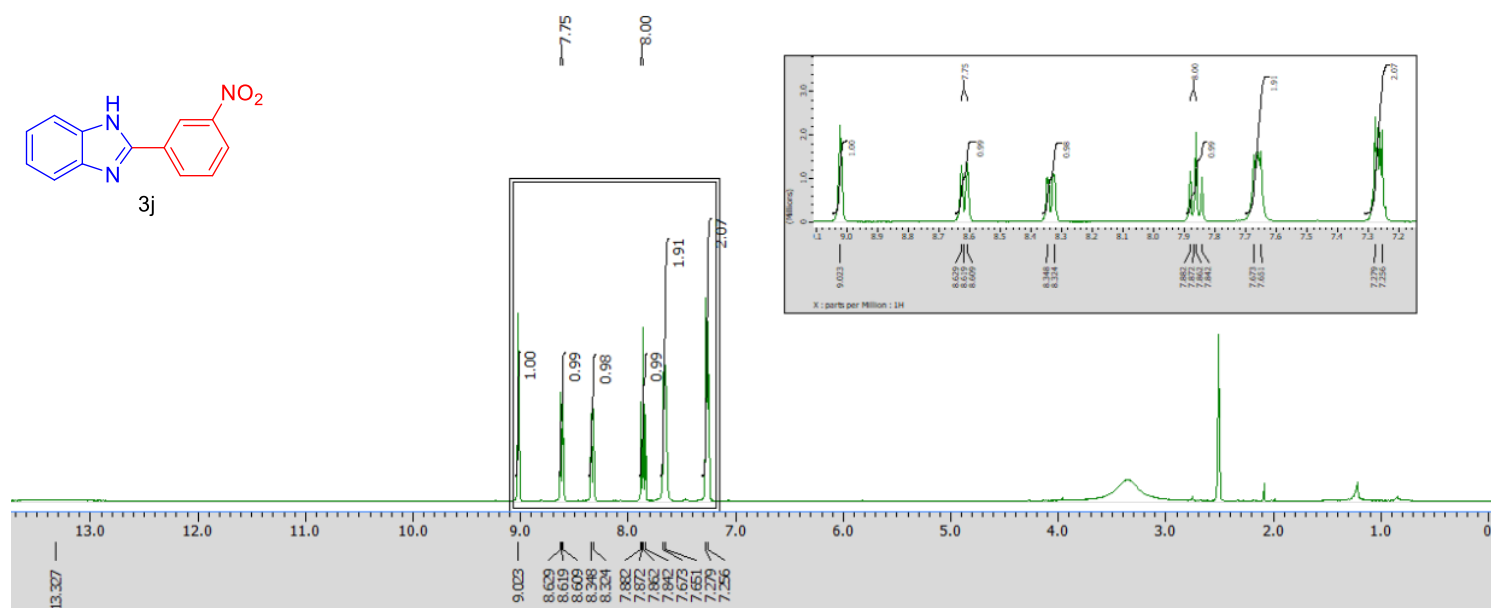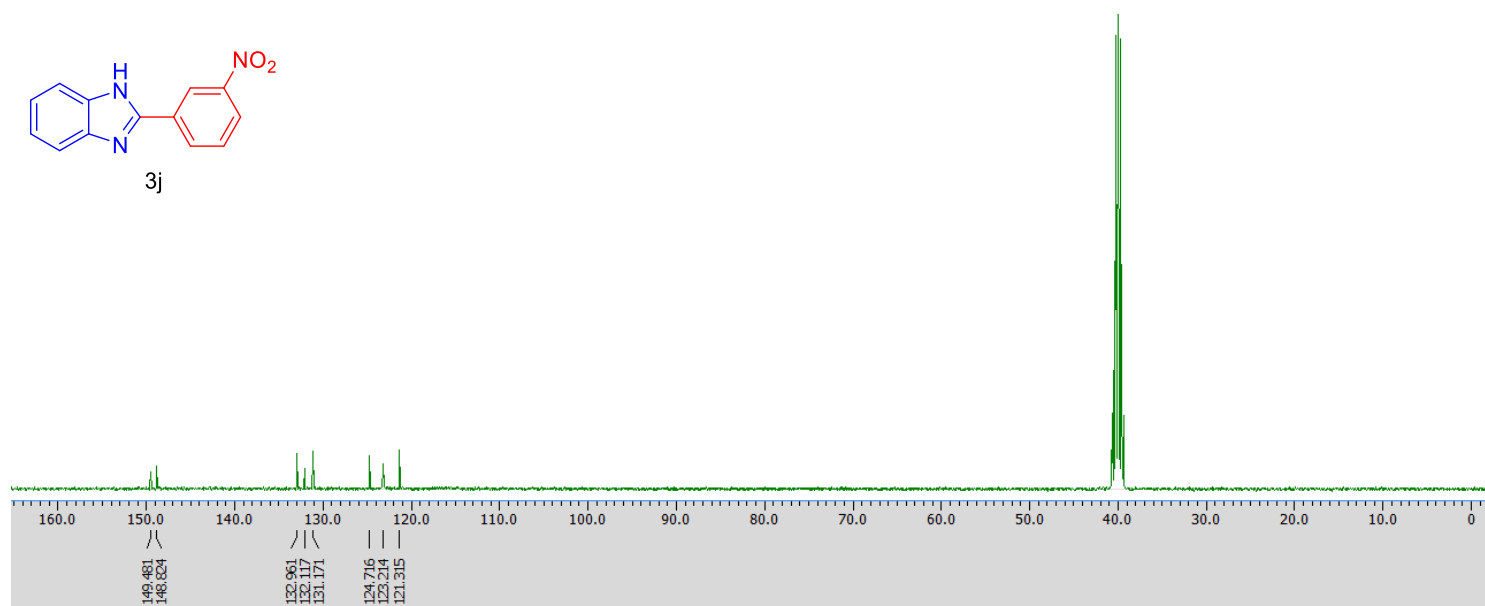



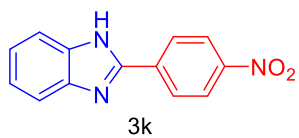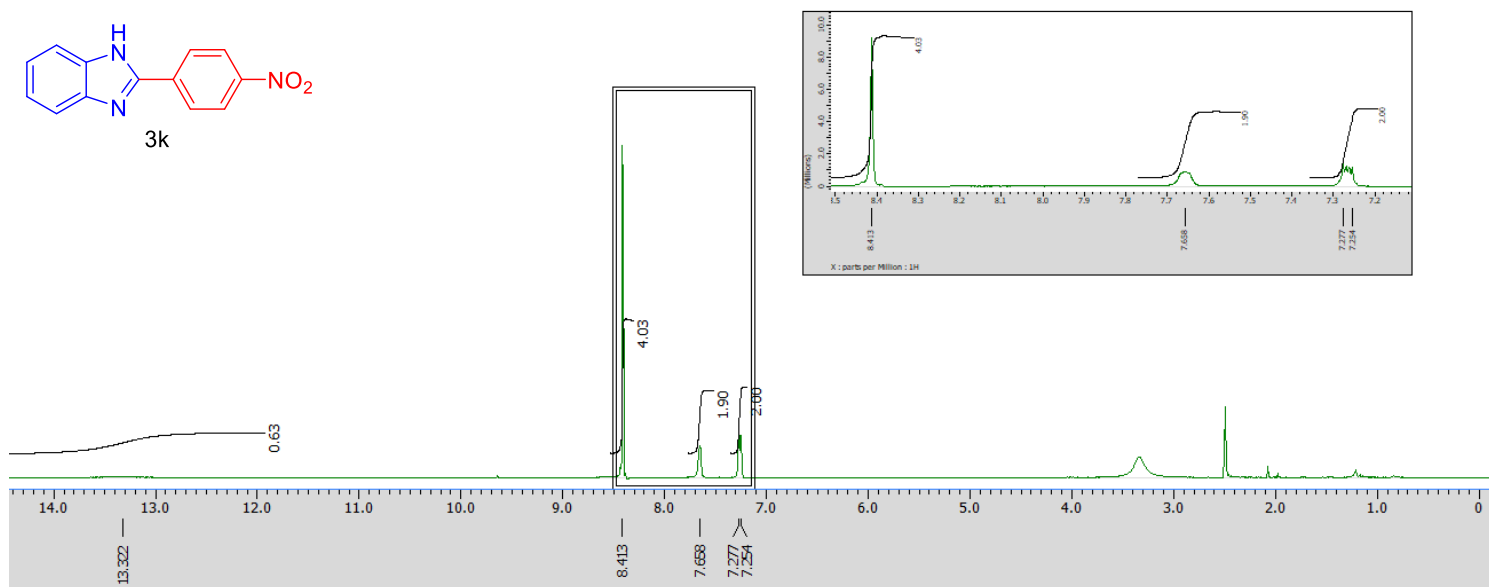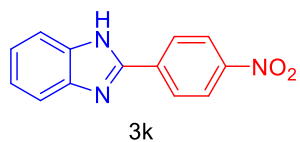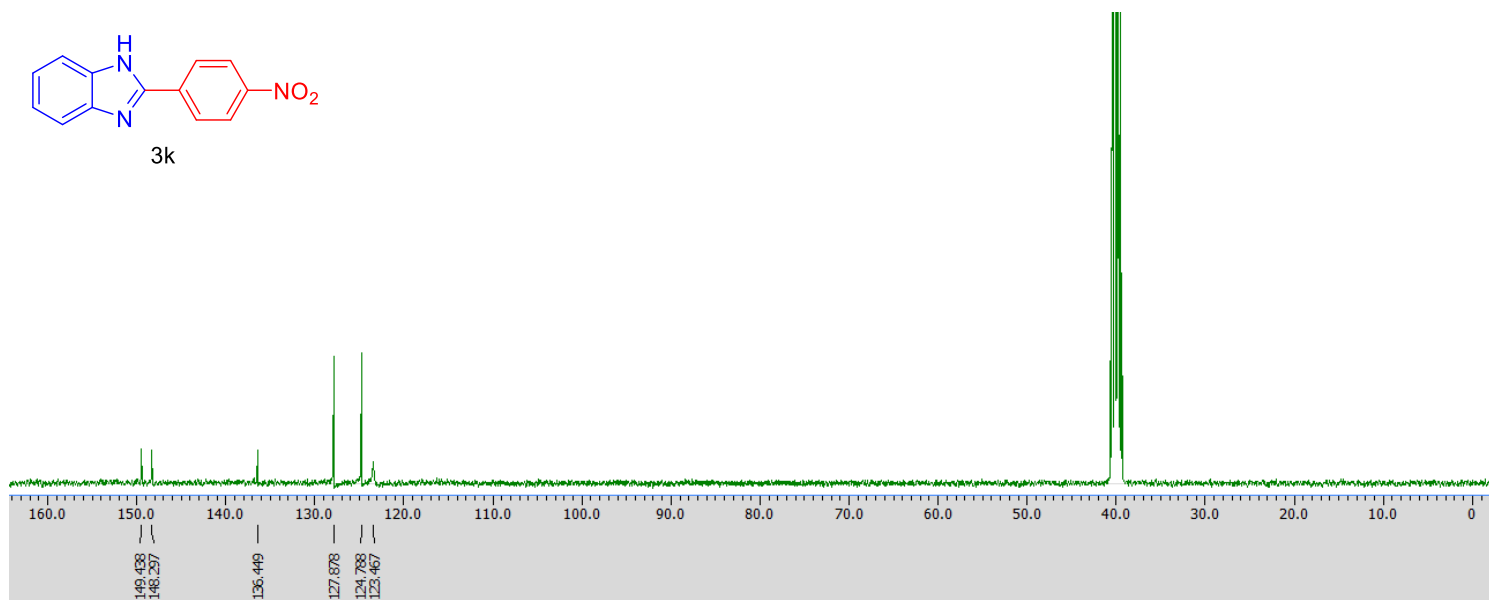

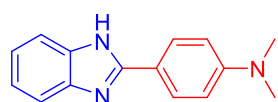

3I

8.50

8.75

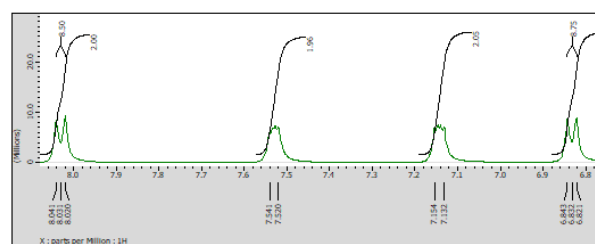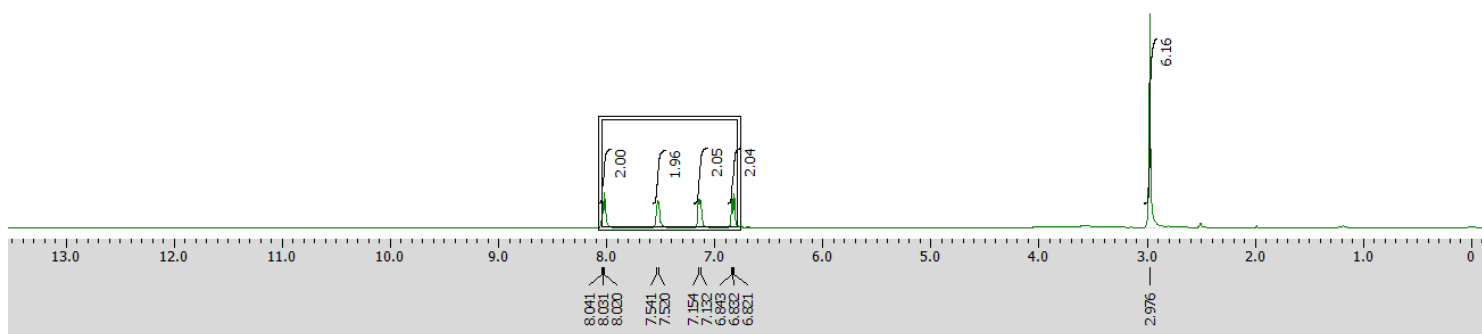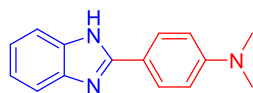

3I

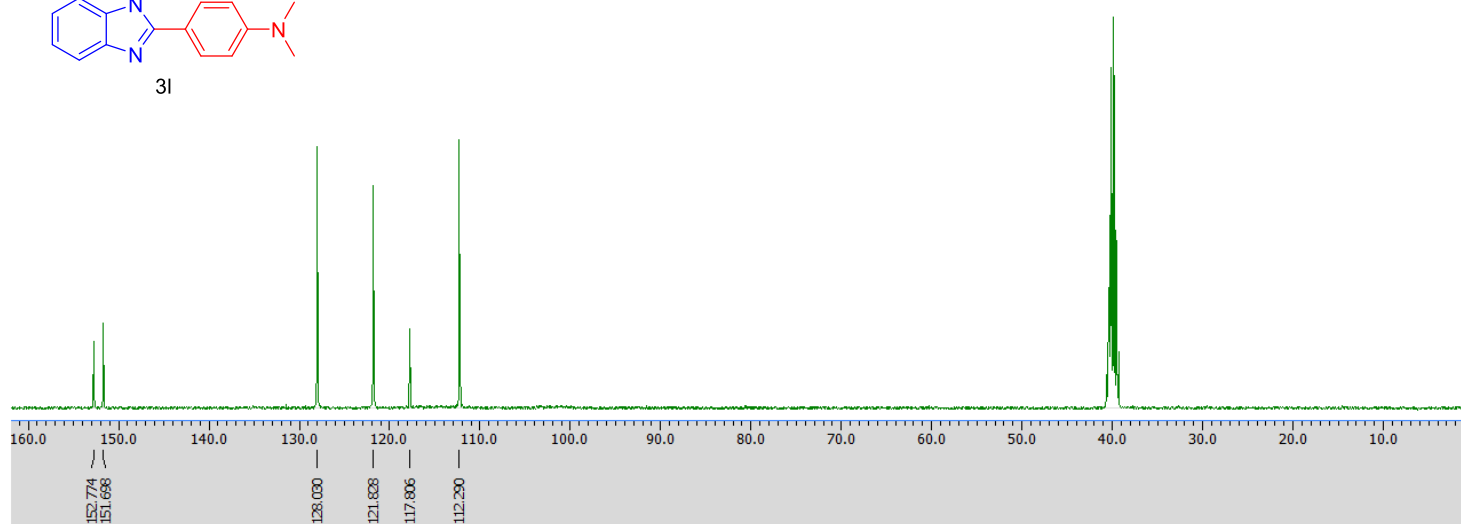

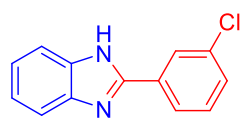

3m

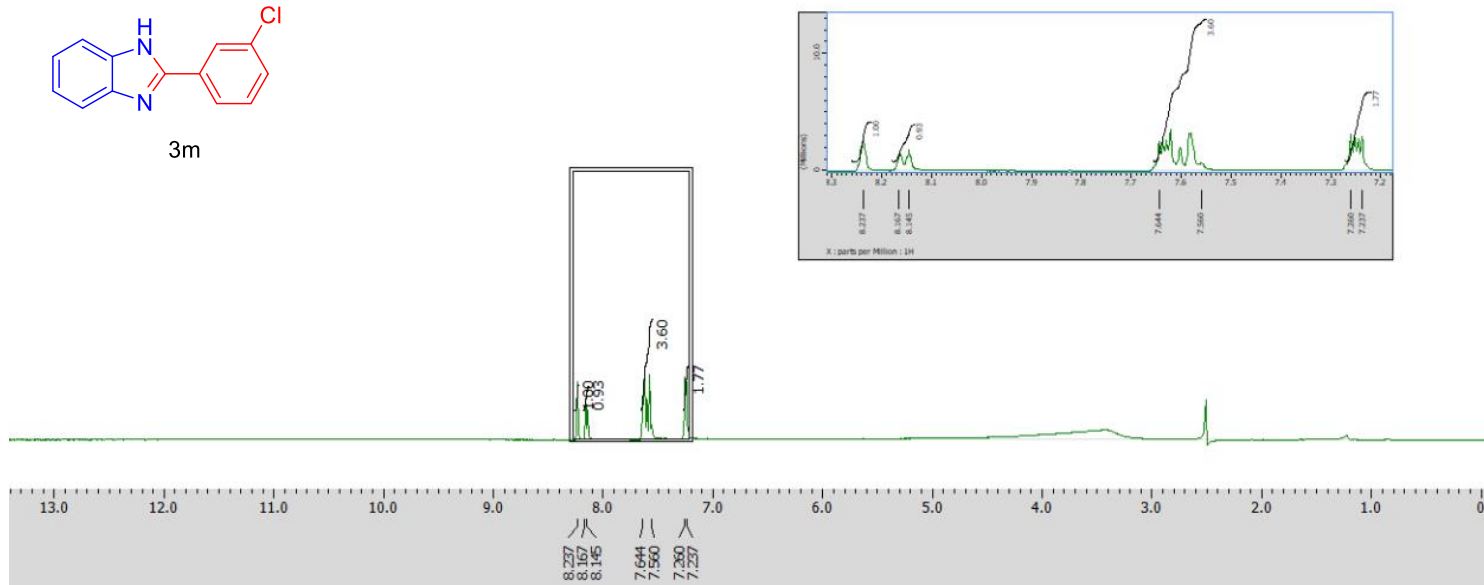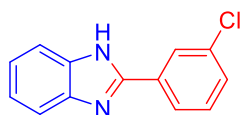

3m

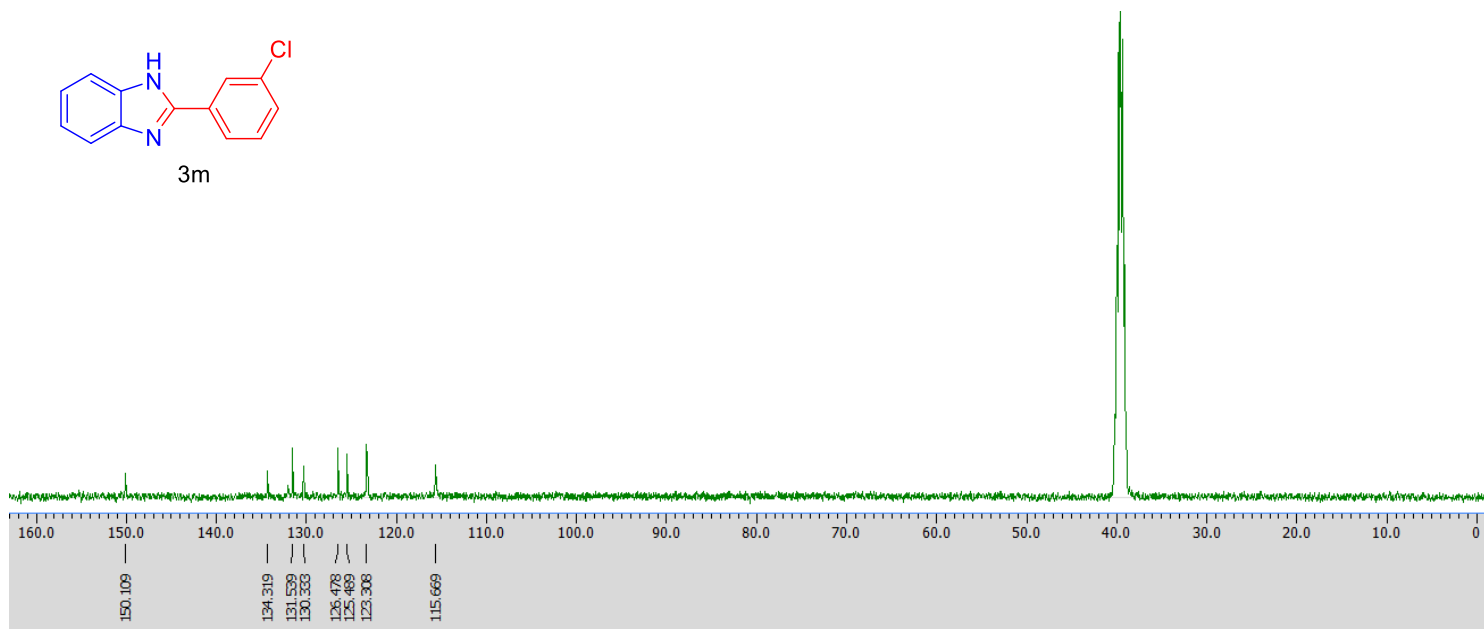

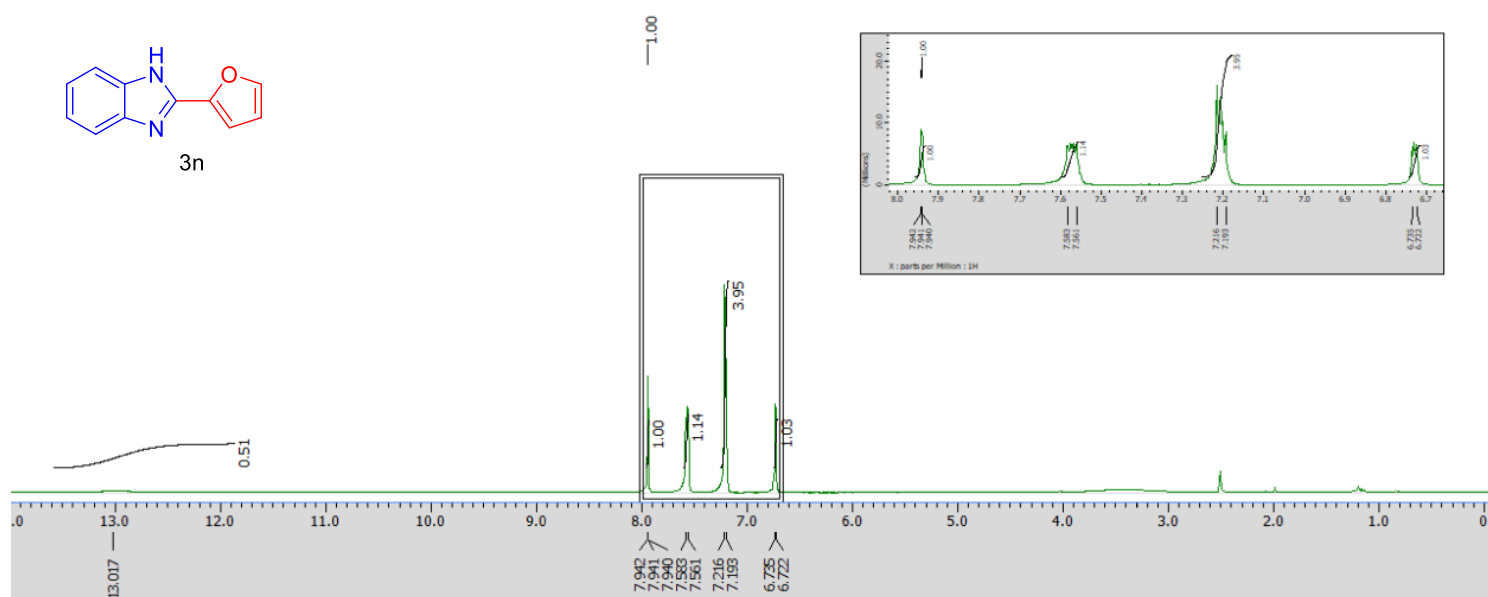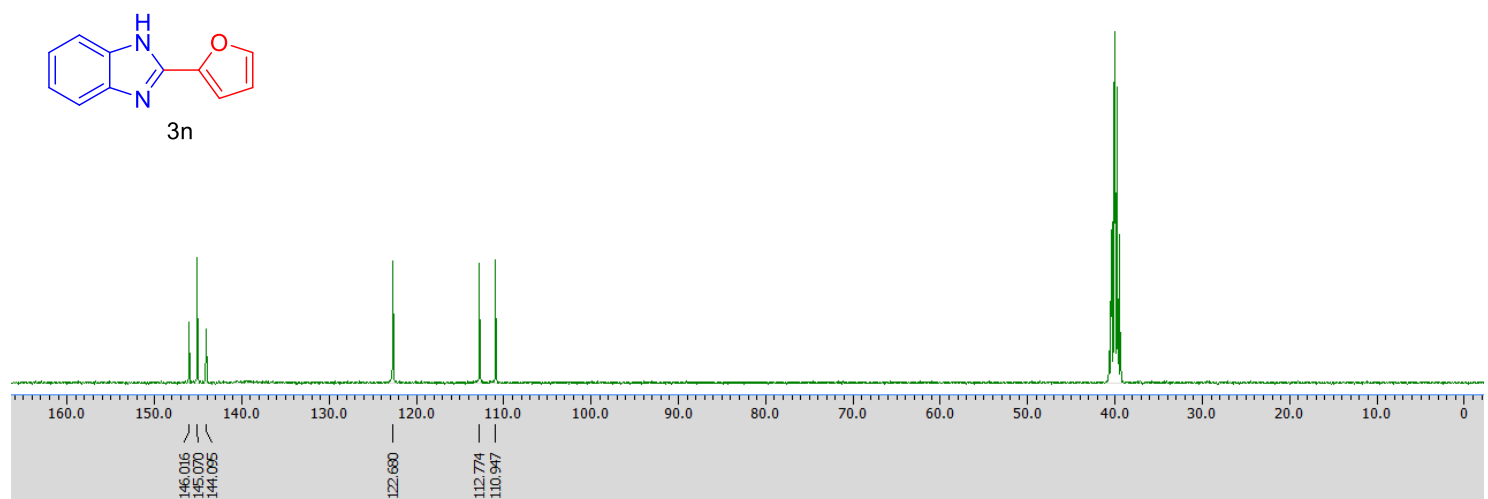

## Mass Spectra of Selected Compounds

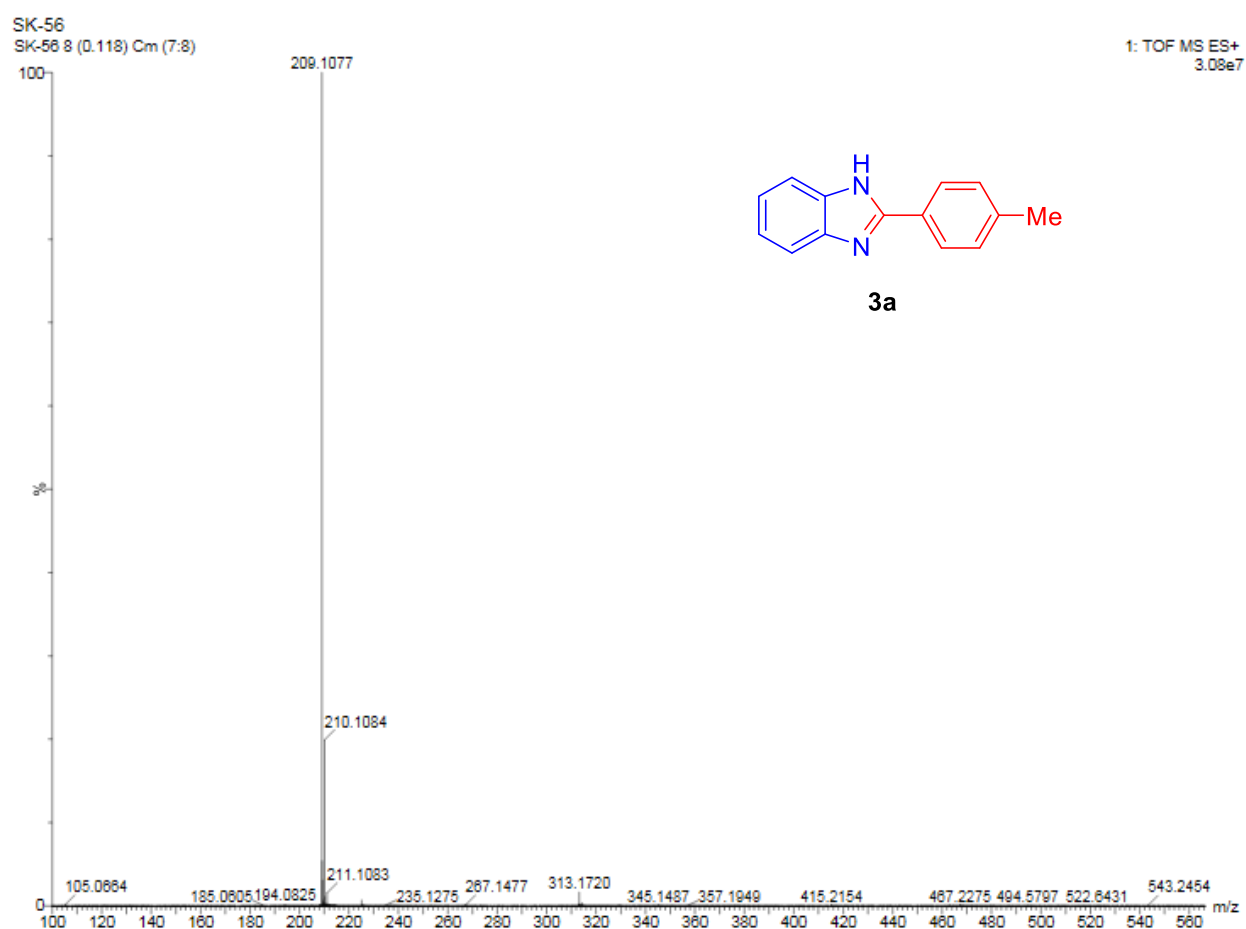

SK-51  
SK-51 6 (0.097) Cm (6)

1: TOF MS ES+  
1.48e7

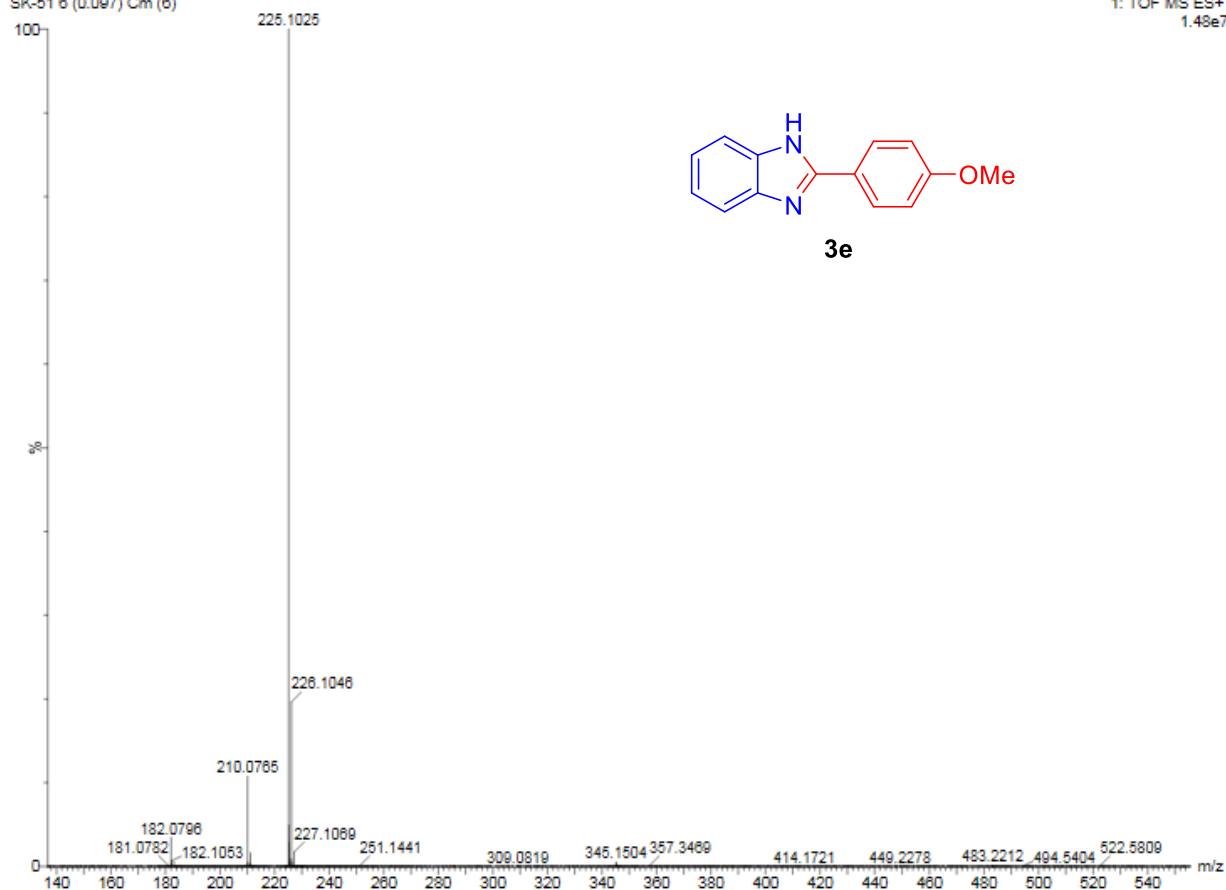

SK-60  
SK-60 7 (0.108) Cm (7)

1: TOF MS ES+  
1.18e7

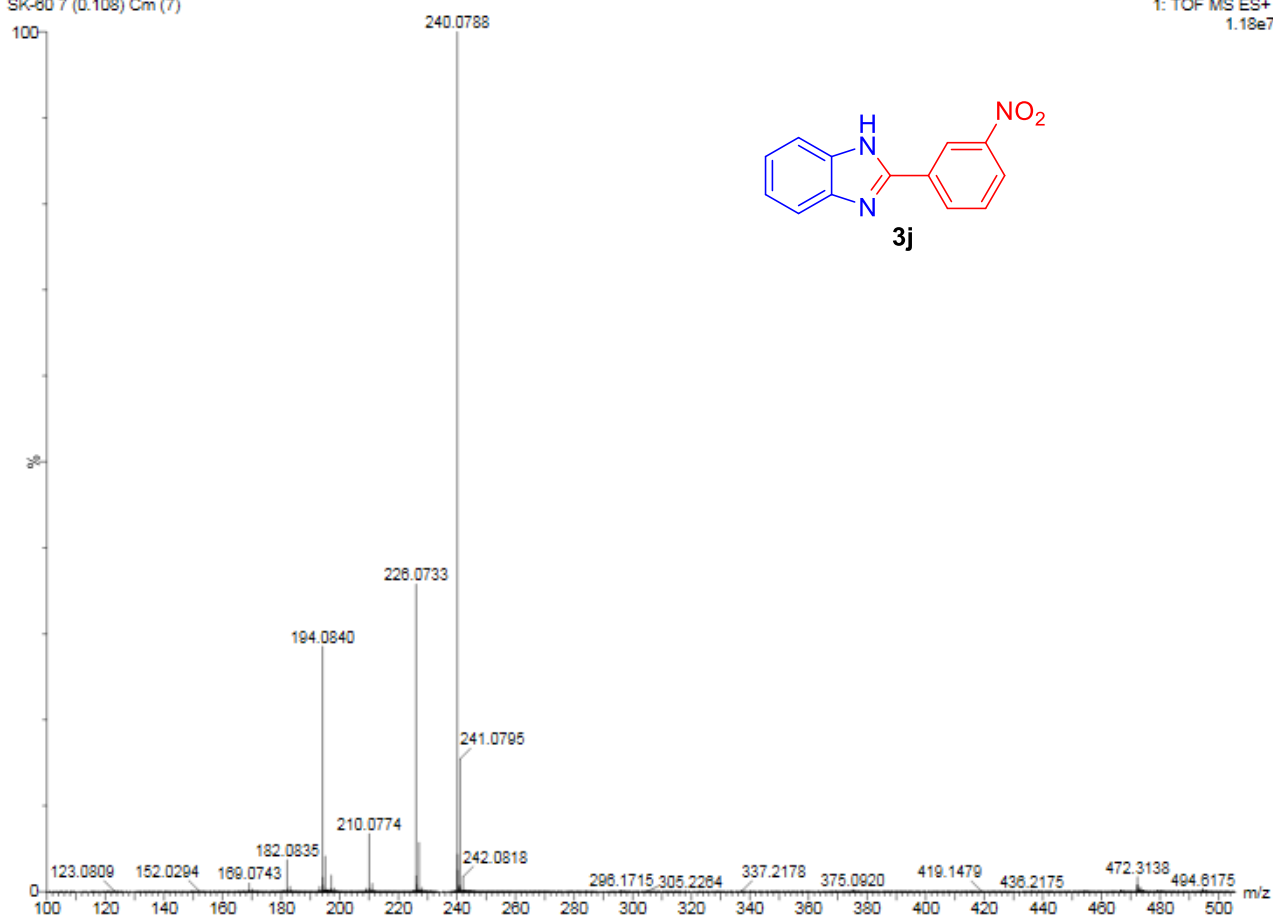

SK-67  
SK-67 8 (0.118) Cm (7:8)

1: TOF MS ES+  
3.04e7

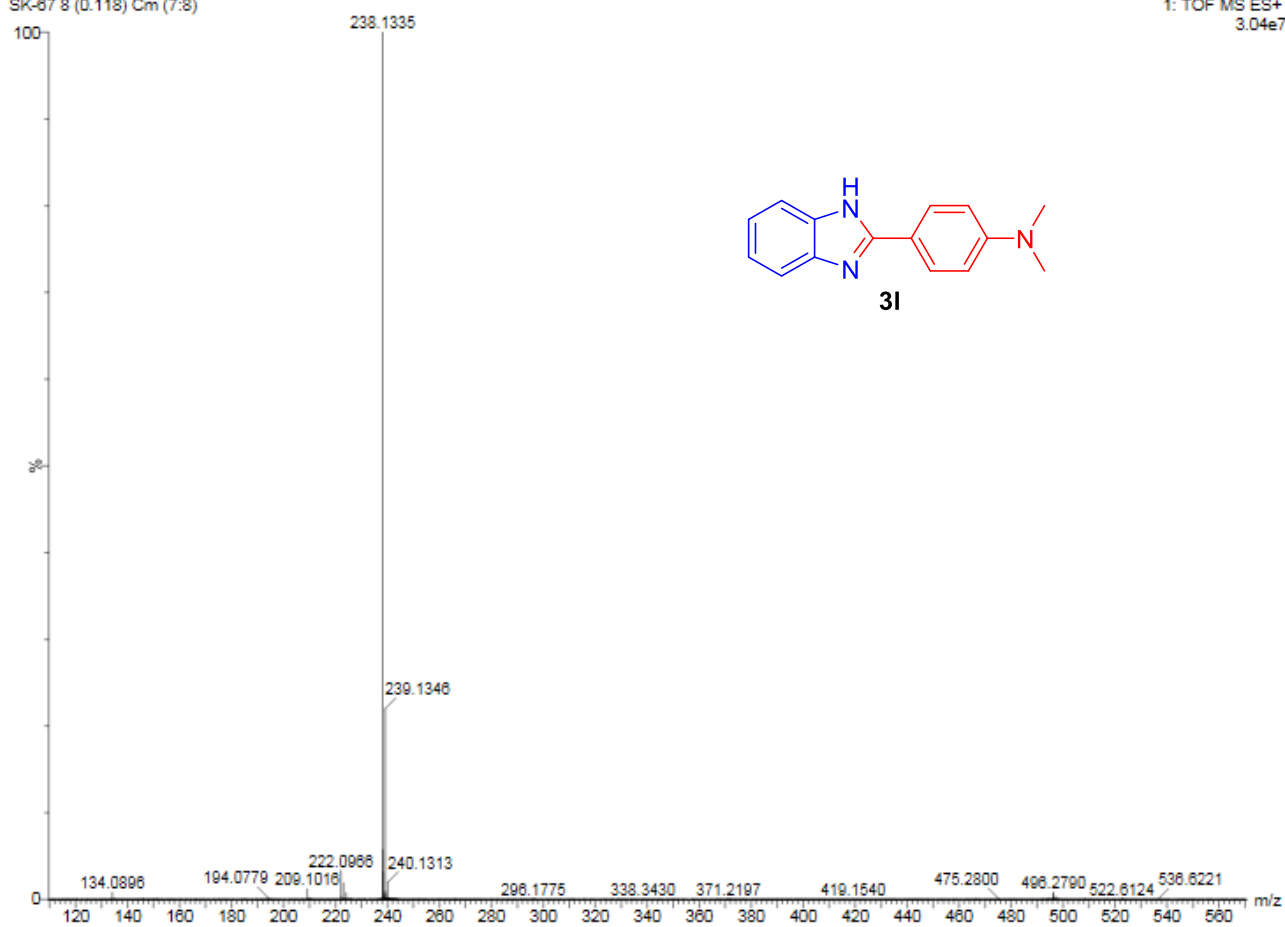



SK-62  
SK-62 8 (0.118) Cm (8)

1: TOF MS ES+  
9.93e6

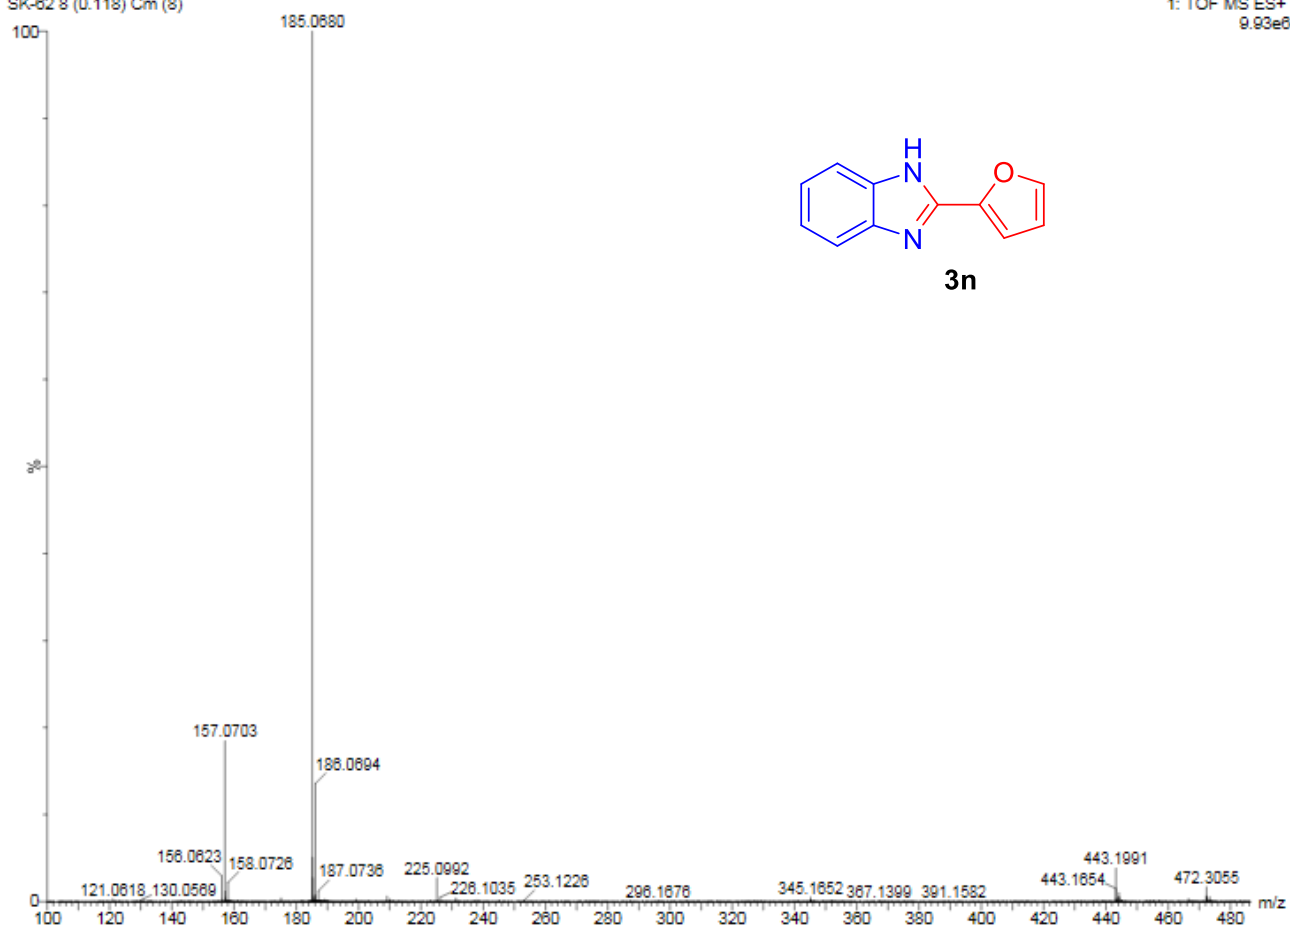

Supplement: d1dt00806d1.pdf [file d1dt00806d1.pdf]
